# Supplementary material for: Engineered Multivalent Nanobodies Efficiently Neutralize SARS-CoV-2 Omicron Subvariants BA.1, BA.4/5, XBB.1 and BQ.1.1
Source: MDPI journal article supplement (doi:10.3390/vaccines12040417), 2024-04-15
Supplement: s1 [file s1]

**A**

(bp)

2000  
1000  
750  
500  
250  
100

**B**

(bp)

28S  
18S  
5S

**C**

(bp)

500  
1000

**D**

10<sup>-1</sup> 10<sup>-2</sup>

**E**

(bp)

2000  
1000  
750  
500  
250  
100

**F**

VHH-1  
VHH-2  
VHH-3  
VHH-4  
VHH-5  
VHH-6  
VHH-7  
VHH-8  
VHH-9  
VHH-10  
VHH-11  
VHH-12  
VHH-13  
VHH-14  
VHH-15  
VHH-16  
VHH-17  
VHH-18  
VHH-19  
VHH-20  
VHH-21  
VHH-22  
VHH-23  
VHH-24

FR1 CDR1 FR2 CDR2 FR3 CDR3 FR4 Hinge

**G**

10<sup>-6</sup> 10<sup>-8</sup> 10<sup>-10</sup>

**Figure S1.** Construction of a VHH phage display library. (A) The integrity of the isolated RNA. The ratio of 28S:18S RNA was close to 2:1, which indicates that the total RNA had good integrity. (B,C) VHH genes were generated by a two-step nested PCR. (D) The VHH library size was measured by counting the clone numbers using the gradient dilution method. (E) The insertion rate of the library was estimated by randomly selecting 24 VHH colonies and performing colony-PCR. (F) Alignment of the amino acid sequences of 24 VHH colonies. (G) The size of the VHH phage display library was measured by counting the clone numbers using the gradient dilution method. M: DNA marker DL 2000.

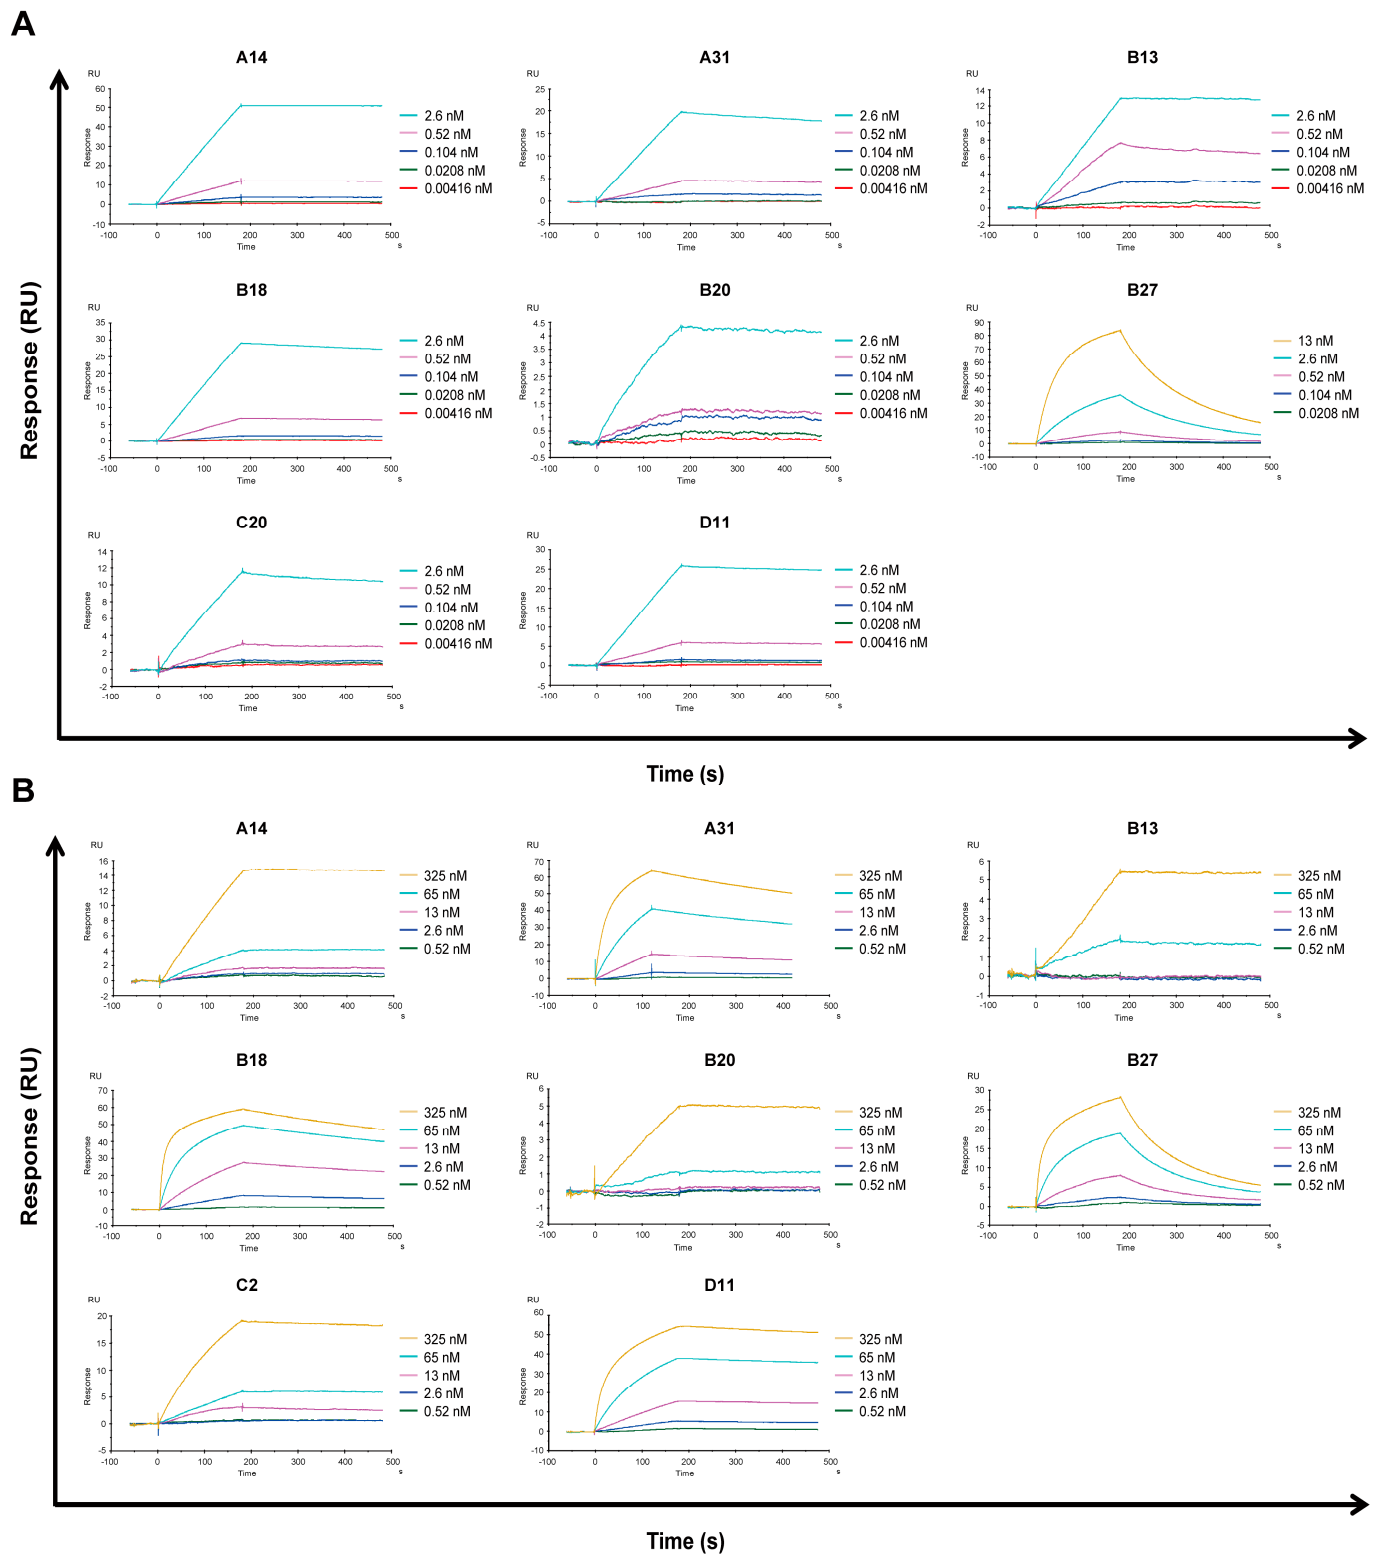

**Table S1.** Primer sequences for amplification of VHH genes.

| Primers  | Sequences                                                      | Products |
|----------|----------------------------------------------------------------|----------|
| AL.CH2   | 5'-ATGGAGAGGACGTCCTTGGGT-3'                                    |          |
| AL.CH2.2 | 5'-TTCGGGGGGAAGAYRAAGAC-3'                                     |          |
| 1st-F    | 5'-GTCCTGGCTGCTCTTCTACAAGG-3'                                  | 750 bp,  |
| 1st-R    | 5'-GGTACGTGCTGTTGAACTGTTCC-3'                                  | 1000 bp  |
| 2nd-F1   | 5'-GATGTGCAGGGCCAGCCGGCCGAGTCTGGRGGAGG-3'(Sfi I)               |          |
| 2nd-R1   | 5'-GGACTAGTGCCGCCGCTGAGGAGACGGTGACCTGGGT-3'(Not I)             |          |
| 2nd-F2   | 5'-TCGCGGCCAGCCGGCCATGGCCCAGKTGCAGCTCGTGGAGTCNGGNGG -3'(Sfi I) | 400 bp   |
| 2nd-R2-1 | 5'-CGAGTGCCGCCGCGGGGTCTTCGCTGTGGTGCG-3'(Not I)                 |          |
| 2nd-R2-2 | 5'-CGAGTGCCGCCGCTTGTGGTTTTGGTGTCTTGGG-3'(Not I)                |          |
